# Supplementary material for: Trends in Suicide Among Youth Aged 10 to 19 Years in the United States, 1975 to 2016
Source: PubMed Central journal article supplement (PMC6537827; doi:10.1001/jamanetworkopen.2019.3886), 2019-05-17
Supplement: jamanetwopen-2-e193886-s001.pdf [file jamanetwopen-2-e193886-s001.pdf]

## Supplementary Online Content

Ruch DA, Sheftall AH, Schlagbaum P, Rausch J, Campo JV, Bridge JA. Trends in suicide among youth aged 10 to 19 years in the United States, 1975 to 2016. *JAMA Netw Open*. 2019;2(5):e193886. doi:10.1001/jamanetworkopen.2019.3886

**eTable 1.** Incidence Rate Ratios (IRR) of Male to Female Suicide Rates Among Youth Aged 10-19 Years in the United States, 1975-2016

**eTable 2.** Trends in Suicide Rates (per 100,000) Among Youth Aged 10 to 14 Years in the United States, 1975-2016

**eTable 3.** Trends in Suicide Rates (per 100,000) Among Youth Aged 15 to 19 Years in the United States, 1975-2016

This supplementary material has been provided by the authors to give readers additional information about their work.

**eTable 1. Incidence Rate Ratios (IRR) of Male to Female Suicide Rates Among Youth Aged 10-19 Years in the United States, 1975-2016 <sup>a</sup>**

|                               | IRR (95% CI) |               | IRR (95% CI) |               | IRR (95% CI) |               | Sex by Time Period Interaction |          |
|-------------------------------|--------------|---------------|--------------|---------------|--------------|---------------|--------------------------------|----------|
|                               | 1975 - 1991  |               | 1992 - 2006  |               | 2007 - 2016  |               | $\chi^2$                       | <i>P</i> |
| <b>Ages 10-14</b>             | 3.14         | (2.74 - 3.61) | 2.74         | (2.45 - 3.07) | 1.80         | (1.53 - 2.12) | 30.41                          | <.001    |
| Race / Ethnicity <sup>b</sup> |              |               |              |               |              |               |                                |          |
| White                         | 3.27         | (2.68 - 4.01) | 2.92         | (2.52 - 3.38) | 2.04         | (1.45 - 2.89) | 8.10                           | .017     |
| Black                         | 2.37         | (1.57 - 3.59) | 3.16         | (2.59 - 3.85) | 2.14         | (1.73 - 2.65) | 4.17                           | .125     |
| Other <sup>c</sup>            | 2.19         | (1.38 - 3.48) | 2.35         | (1.70 - 3.24) | 1.29         | (0.98 - 1.70) | 8.79                           | .012     |
| Hispanic <sup>d</sup>         | 1.82         | (0.72 - 4.55) | 1.88         | (1.50 - 2.36) | 1.21         | (0.88 - 1.67) | 5.39                           | .068     |
| Method                        |              |               |              |               |              |               |                                |          |
| Firearm                       | 3.24         | (2.60 - 4.04) | 3.48         | (2.47 - 4.89) | 4.40         | (2.92 - 6.63) | 1.72                           | .424     |
| Hanging/Suffocation           | 6.17         | (4.92 - 7.74) | 3.09         | (2.60 - 3.67) | 1.42         | (1.13 - 1.78) | 88.83                          | <.001    |
| Poisoning                     | 0.34         | (0.22 - 0.50) | 0.36         | (0.23 - 0.58) | 0.30         | (0.17 - 0.54) | 0.25                           | .882     |
| Other <sup>e</sup>            | 1.23         | (0.79 - 1.91) | 1.20         | (0.82 - 1.75) | 1.39         | (0.71 - 2.71) | 0.18                           | .914     |
| Region                        |              |               |              |               |              |               |                                |          |
| Northeast                     | 4.41         | (3.36 - 5.78) | 2.99         | (2.40 - 3.73) | 1.38         | (1.02 - 1.87) | 36.53                          | <.001    |
| Midwest                       | 3.60         | (2.80 - 4.62) | 2.84         | (2.46 - 3.27) | 1.81         | (1.42 - 2.32) | 17.76                          | <.001    |
| South                         | 2.69         | (2.20 - 3.29) | 3.15         | (2.67 - 3.70) | 1.97         | (1.42 - 2.74) | 8.10                           | .012     |
| West                          | 2.81         | (2.20 - 3.58) | 2.27         | (1.88 - 2.75) | 1.96         | (1.51 - 2.54) | 4.50                           | .105     |
| <hr/>                         |              |               |              |               |              |               |                                |          |
|                               | 1975 - 1987  |               | 1988 - 2006  |               | 2007 - 2016  |               | $\chi^2$                       | <i>P</i> |
| <b>Ages 15-19</b>             | 4.15         | (3.79 - 4.54) | 4.56         | (4.18 - 4.97) | 3.31         | (2.96 - 3.69) | 20.89                          | <.001    |
| Race / Ethnicity <sup>b</sup> |              |               |              |               |              |               |                                |          |
| White                         | 4.18         | (3.81 - 4.58) | 4.75         | (4.32 - 5.22) | 3.59         | (3.07 - 4.21) | 11.60                          | .003     |
| Black                         | 3.58         | (3.07 - 4.18) | 6.13         | (5.07 - 7.42) | 3.51         | (2.95 - 4.18) | 24.66                          | <.001    |
| Other <sup>c</sup>            | 4.02         | (3.29 - 4.92) | 3.01         | (2.62 - 3.45) | 2.35         | (2.00 - 2.76) | 16.81                          | <.001    |
| Hispanic <sup>d</sup>         | -            |               | 3.97         | (3.43 - 4.59) | 2.89         | (2.54 - 3.28) | 8.75                           | .003     |
| Method                        |              |               |              |               |              |               |                                |          |
| Firearm                       | 5.09         | (4.69 - 5.51) | 6.77         | (5.48 - 8.37) | 7.39         | (6.26 - 8.73) | 7.74                           | .021     |
| Hanging/Suffocation           | 7.47         | (6.60 - 8.45) | 4.07         | (3.43 - 4.82) | 2.41         | (2.13 - 2.74) | 82.15                          | <.001    |
| Poisoning                     | 1.58         | (1.35 - 1.85) | 1.29         | (0.97 - 1.73) | 1.16         | (0.98 - 1.37) | 2.55                           | .279     |
| Other <sup>e</sup>            | 2.45         | (2.15 - 2.79) | 3.40         | (3.01 - 3.84) | 2.65         | (2.06 - 3.41) | 9.96                           | .007     |
| Region                        |              |               |              |               |              |               |                                |          |
| Northeast                     | 4.94         | (4.46 - 5.46) | 4.72         | (4.16 - 5.37) | 3.00         | (2.61 - 3.44) | 29.76                          | <.001    |
| Midwest                       | 4.65         | (4.11 - 5.27) | 4.78         | (4.20 - 5.45) | 3.45         | (3.02 - 3.96) | 11.80                          | .003     |
| South                         | 3.75         | (3.45 - 4.08) | 4.79         | (4.25 - 5.39) | 3.69         | (3.13 - 4.35) | 12.23                          | .002     |
| West                          | 3.71         | (3.38 - 4.07) | 4.13         | (3.63 - 4.70) | 3.07         | (2.64 - 3.57) | 9.67                           | .008     |

<sup>a</sup> Male-to-female incidence rate ratio (IRR) time periods reflect significant linear segment trends associated with female youth in joinpoint analyses. Comparisons of the male-to-female IRR for each time period were performed using the  $\chi^2$  test to identify significant trends among demographic subgroups.

<sup>b</sup> Racial groups for White, Black, and Other are non-Hispanic

<sup>c</sup> Includes American Indian/Alaskan Native and Asian/Pacific Islander

<sup>d</sup> Hispanic information only available for 1990 forward and excludes data from the following states/years: Alabama 1990; Oklahoma 1990-96; New Hampshire 1990-92; Louisiana, 1990-91

<sup>e</sup> Other suicide methods include fall, transportation-related, drowning, cut/pierce, fire/burn, and unspecified methods.

**eTable 2. Trends in Suicide Rates (per 100,000) Among Youth Aged 10 to 14 Years in the United States, 1975-2016**

| Ages 10-14            | 1975-1991 |       |        |      | 1992-2006 |       |        |      | 2007-2016 |       |        |      |
|-----------------------|-----------|-------|--------|------|-----------|-------|--------|------|-----------|-------|--------|------|
|                       | Male      |       | Female |      | Male      |       | Female |      | Male      |       | Female |      |
|                       | No.       | Rate  | No.    | Rate | No.       | Rate  | No.    | Rate | No.       | Rate  | No.    | Rate |
| Race / Ethnicity      |           |       |        |      |           |       |        |      |           |       |        |      |
| White                 | 2350      | 1.85  | 680    | 0.57 | 2266      | 2.27  | 732    | 0.78 | 1406      | 2.36  | 651    | 1.15 |
| Black                 | 229       | 1.02  | 97     | 0.43 | 417       | 1.75  | 128    | 0.56 | 292       | 1.83  | 132    | 0.86 |
| Other                 | 78        | 1.61  | 36     | 0.74 | 162       | 1.96  | 62     | 0.84 | 121       | 1.82  | 89     | 1.41 |
| Hispanic <sup>a</sup> | 25        | 1.19  | 14     | 0.65 | 337       | 1.37  | 168    | 0.73 | 262       | 1.11  | 210    | 0.92 |
| Method                |           |       |        |      |           |       |        |      | 2081      |       | 1082   |      |
| Firearm               | 1472      | 0.94  | 437    | 0.29 | 1443      | 0.93  | 394    | 0.27 | 864       | 0.82  | 188    | 0.19 |
| Hanging/Suffocation   | 1100      | 0.70  | 170    | 0.11 | 1614      | 1.04  | 498    | 0.34 | 1146      | 1.08  | 773    | 0.76 |
| Poisoning             | 65        | 0.04  | 185    | 0.12 | 57        | 0.04  | 144    | 0.10 | 29        | 0.03  | 92     | 0.09 |
| Other <sup>b</sup>    | 45        | 0.03  | 35     | 0.02 | 68        | 0.04  | 54     | 0.04 | 42        | 0.04  | 29     | 0.03 |
| Region                |           |       |        |      |           |       |        |      |           |       |        |      |
| Northeast             | 420       | 1.31  | 92     | 0.30 | 396       | 1.41  | 126    | 0.47 | 226       | 1.28  | 156    | 0.92 |
| Midwest               | 672       | 1.66  | 179    | 0.46 | 809       | 2.24  | 271    | 0.79 | 524       | 2.28  | 276    | 1.26 |
| South                 | 947       | 1.77  | 337    | 0.66 | 1181      | 2.16  | 359    | 0.69 | 779       | 1.96  | 380    | 1.00 |
| West                  | 643       | 2.13  | 219    | 0.76 | 796       | 2.21  | 334    | 0.98 | 552       | 2.18  | 270    | 1.12 |
| South                 | 6089      | 13.42 | 1563   | 3.59 | 10225     | 15.21 | 2034   | 3.19 | 5127      | 12.55 | 1322   | 3.40 |
| West                  | 4156      | 16.53 | 1062   | 4.45 | 6883      | 16.37 | 1563   | 3.97 | 3538      | 13.44 | 1088   | 4.38 |

<sup>a</sup> Hispanic information only available for 1990 forward and excludes data from the following states/years: Alabama 1990; Oklahoma 1990-96; New Hampshire 1990-92; Louisiana, 1990-91.

<sup>b</sup> Includes American Indian/Alaskan Native and Asian/Pacific Islander

**eTable 3. Trends in Suicide Rates (per 100,000) Among Youth Aged 15 to 19 Years in the United States, 1975-2016**

| Ages 15-19            | 1975-1987 |       |        |      | 1988-2006 |       |        |      | 2007-2016 |       |        |      |
|-----------------------|-----------|-------|--------|------|-----------|-------|--------|------|-----------|-------|--------|------|
|                       | Male      |       | Female |      | Male      |       | Female |      | Male      |       | Female |      |
|                       | No.       | Rate  | No.    | Rate | No.       | Rate  | No.    | Rate | No.       | Rate  | No.    | Rate |
| Race / Ethnicity      |           |       |        |      |           |       |        |      |           |       |        |      |
| White                 | 16703     | 14.97 | 3838   | 3.58 | 20918     | 16.78 | 4251   | 3.54 | 9756      | 15.35 | 2564   | 4.27 |
| Black                 | 1230      | 6.67  | 351    | 1.87 | 2945      | 10.61 | 478    | 1.73 | 1295      | 7.52  | 356    | 2.14 |
| Other                 | 556       | 15.98 | 130    | 3.99 | 1266      | 13.79 | 410    | 4.58 | 850       | 12.56 | 352    | 5.34 |
| Hispanic <sup>a</sup> | -         | -     | -      | -    | 2686      | 10.13 | 605    | 2.55 | 1935      | 8.29  | 632    | 2.88 |
| Method                |           |       |        |      |           |       |        |      |           |       |        |      |
| Firearm               | 11785     | 8.80  | 2245   | 1.74 | 17614     | 9.32  | 2455   | 1.37 | 6701      | 6.05  | 861    | 0.82 |
| Hanging/Suffocation   | 3806      | 2.84  | 493    | 0.38 | 7137      | 3.78  | 1681   | 0.94 | 5499      | 4.97  | 2164   | 2.06 |
| Poisoning             | 2035      | 1.52  | 1241   | 0.96 | 1669      | 0.88  | 1220   | 0.68 | 638       | 0.58  | 522    | 0.50 |
| Other <sup>b</sup>    | 863       | 0.64  | 340    | 0.26 | 1395      | 0.74  | 388    | 0.22 | 998       | 0.90  | 357    | 0.34 |
| Region                |           |       |        |      |           |       |        |      |           |       |        |      |
| Northeast             | 3056      | 10.70 | 608    | 2.17 | 3582      | 10.42 | 729    | 2.21 | 1667      | 8.58  | 532    | 2.86 |
| Midwest               | 5188      | 14.90 | 1086   | 3.21 | 7125      | 15.93 | 1418   | 3.34 | 3504      | 14.53 | 962    | 4.20 |
| South                 | 6089      | 13.42 | 1563   | 3.59 | 10225     | 15.21 | 2034   | 3.19 | 5127      | 12.55 | 1322   | 3.40 |
| West                  | 4156      | 16.53 | 1062   | 4.45 | 6883      | 16.37 | 1563   | 3.97 | 3538      | 13.44 | 1088   | 4.38 |

<sup>a</sup> Hispanic information only available for 1990 forward and excludes data from the following states/years: Alabama 1990; Oklahoma 1990-96; New Hampshire 1990-92; Louisiana, 1990-91.

<sup>b</sup> Includes American Indian/Alaskan Native and Asian/Pacific Islander.
